# Supplementary material for: The development of “fab-chips” as low-cost, sensitive surface-enhanced Raman spectroscopy (SERS) substrates for analytical applications
Source: Royal Society of Chemistry journal article supplement (doi:10.1039/c4an01633e), 2014-11-24
Supplement: c4an01633e1.pdf [file c4an01633e1.pdf]

Supplementary Information

**The development of “Fab-Chips” as low-cost, sensitive surface-enhanced Raman spectroscopy (SERS) substrates for analytical applications**

Ashley M. Robinson<sup>a</sup>, Lili Zhao<sup>a</sup>, Marwa Yasmin<sup>a</sup>, Paridhi Bhandari<sup>b</sup>, Scott G. Harroun<sup>a</sup>,  
Dhananjaya Dendukuri<sup>b</sup>, Jonathan Blackburn<sup>c</sup>, Christa L. Brosseau<sup>a\*</sup>

<sup>a</sup>Department of Chemistry  
Saint Mary’s University  
923 Robie Street  
Halifax, N.S  
B3H 3C3  
Canada

<sup>b</sup>Achira Labs Pvt. Ltd.  
57, 1st Main Road  
JP Nagar Phase III  
Bangalore 560078  
India

<sup>c</sup>Institute of Infectious Disease & Molecular Medicine  
University of Cape Town  
Faculty of Health Sciences  
Cape Town, South Africa

\*Corresponding Author. Dr. C. L. Brosseau, Saint Mary’s University, Halifax, N. S., Canada B3H 3C3. Email: [christa.brosseau@smu.ca](mailto:christa.brosseau@smu.ca); Fax: +1 (902) 496-8104; Tel: +1 (902) 496-8175

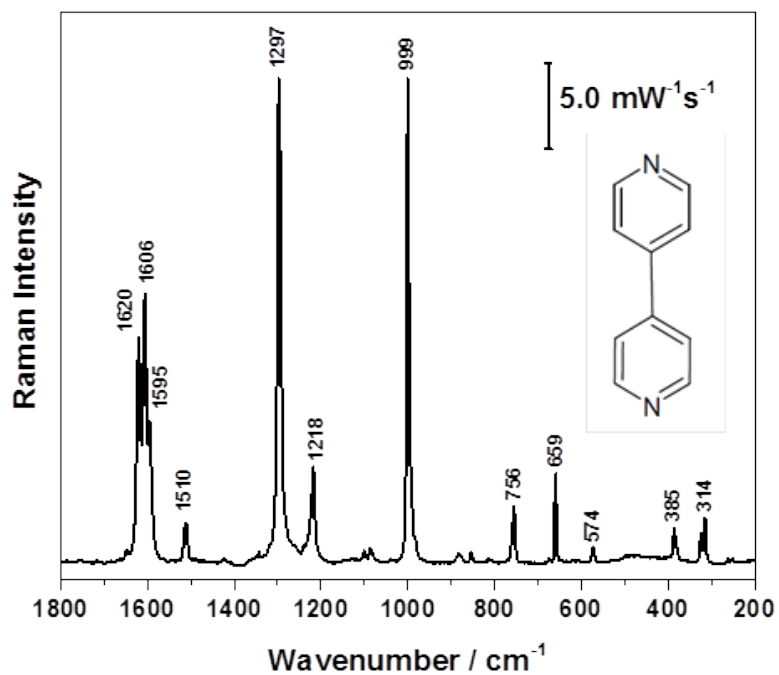

**Figure S1.** Normal Raman signal of pure 4, 4'-BiPy powder (532 nm, 10 mW, 30 s) and molecular structure of 4, 4'-BiPy.

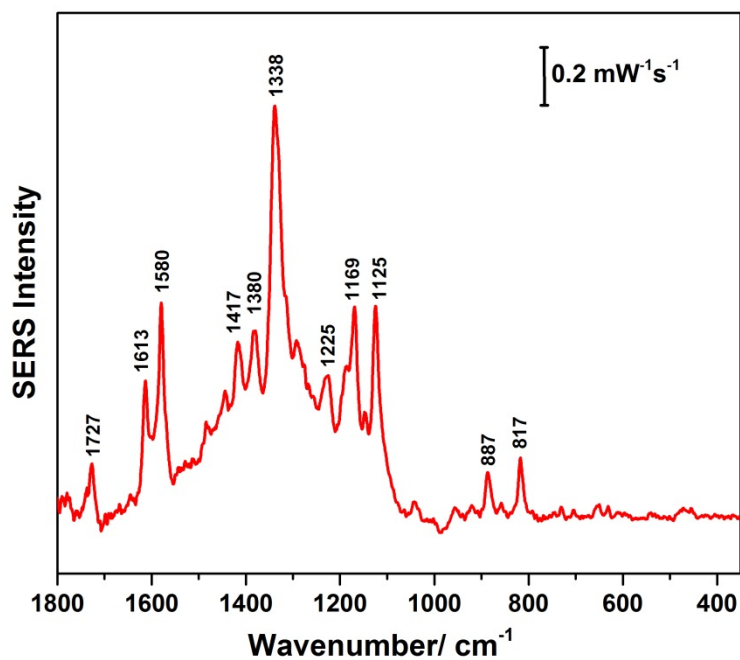

**Figure S2.** SERS signal of 4, 4'-BiPy on zari fabric, collected at 532 nm. No bands for 4, 4'-BiPy can be observed; those from silk dominate the signal.

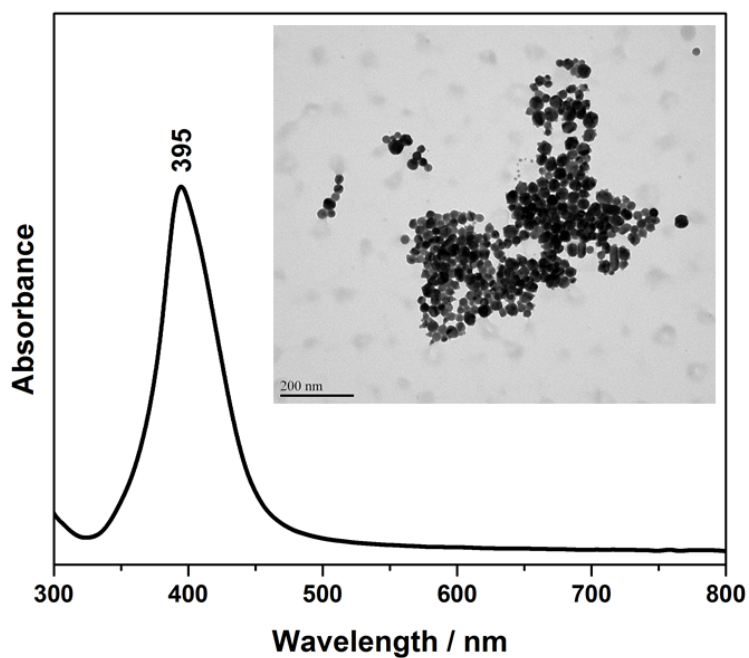

**Figure S3.** UV-vis spectrum of the modified citrate-reduced AgNPs. Inset: TEM image of the corresponding AgNPs (87,000x).

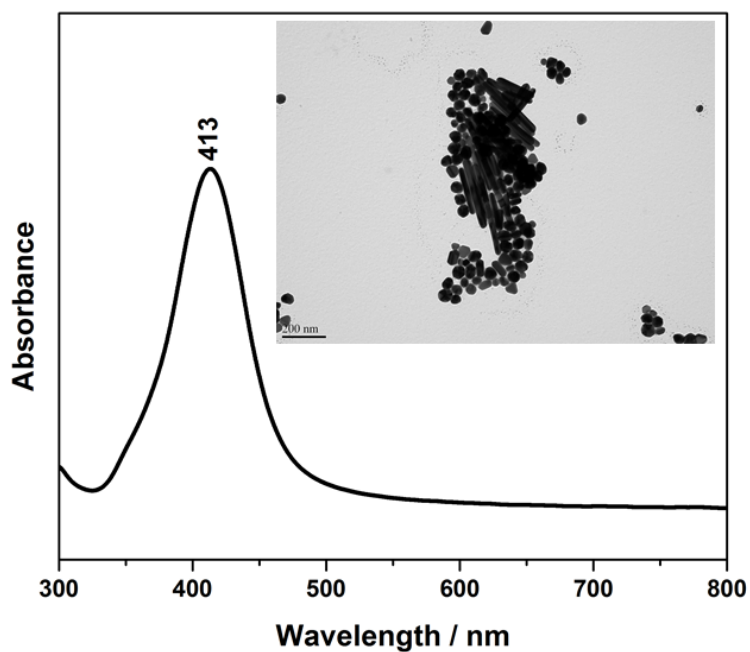

**Figure S4.** UV-vis spectrum of the silver colloids prepared during the *in situ* modification of the *zari* fabric. Inset: TEM image of the corresponding AgNPs. Many long silver rods can be observed.

## Estimation of surface enhancement factor

The enhancement factor can be defined as:

$$EF = (I_{surf} / N_{surf}) / (I_{bulk} / N_{bulk}), \quad (1)$$

where  $I_{surf}$  and  $I_{bulk}$  denote the integrated intensities of the same band for BiPy<sub>ads</sub> and BiPy<sub>sol</sub> respectively, whereas  $N_{surf}$  and  $N_{bulk}$  represent the number of the corresponding BiPy<sub>ads</sub> and BiPy<sub>sol</sub> molecules effectively excited by a laser beam.<sup>1,2</sup>

The calculation of  $N_{surf}$  can be carried out using the following approximation if uniform arrangement of silver nanoparticles and monolayer adsorption is assumed:

$$N_{surf} = ((A/\pi r^2)(2\pi r^2)) / \sigma = 2A / \sigma, \quad (2)$$

Where  $A$  is the area of the laser spot and  $\sigma$  is the surface area occupied by an adsorbed BiPy molecule. It has been reported that the cross sectional area is 0.4 nm<sup>2</sup> for BiPy from Corey, Pauling and later improved by Kultun (CPK) molecular model.<sup>3</sup>

Similar to the confocal Raman microscope, the DXR Smart Raman microscope processes a sensitive depth resolution, the term  $N_{bulk}$  in Eq. (1) cannot be obtained directly as for a conventional Raman spectroscopy. It has to be calculated based on the focal feature of the microscope as reported by Etchegoin and Tian.<sup>1,2</sup> Figure S3 shows the intensity-distance profile obtained from silicon wafer (solid line). The integrated intensity of the strongest band for Si at 520.2 cm<sup>-1</sup> was measured as the Si wafer plane was moved front and back.

For the illuminated volume of solution, a plane of solution can be imaginarily considered to move front and back, just like the realistically movable Si wafer. An effective layer ( $h$ ) is

defined, within which, each BiPy molecule yields the same contribution to the Raman signal as those localized in the ideally focused plane. Thus,

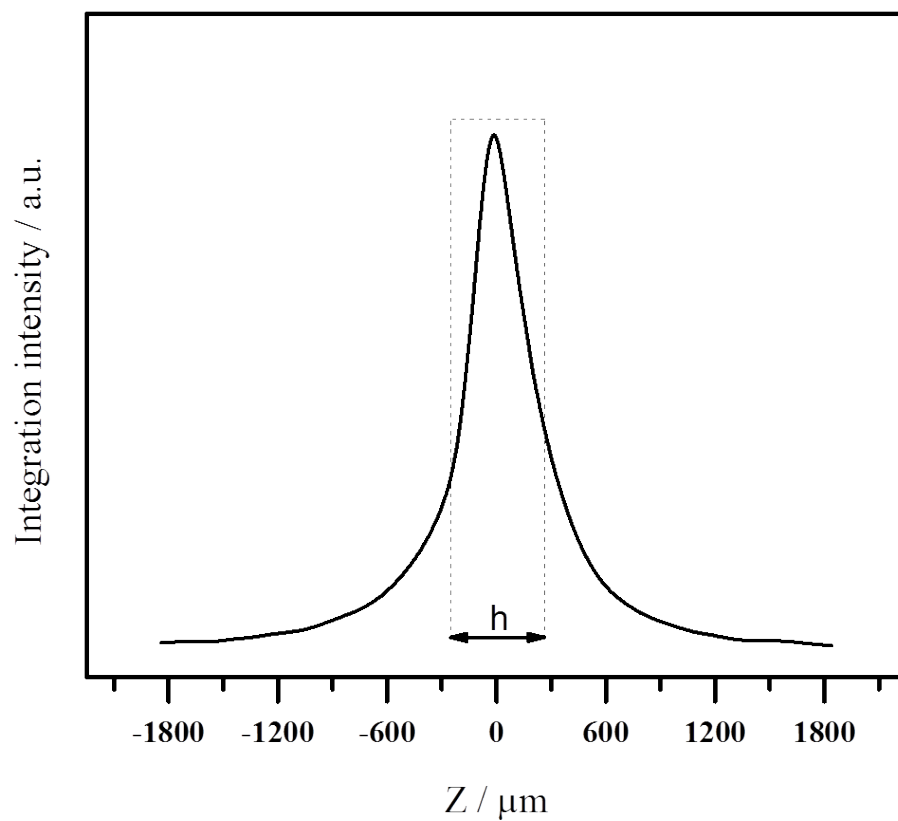

**Figure S5.** Raman intensity-depth profile of the integrated intensity of 520.2 cm<sup>-1</sup> band for a Si wafer.

$$h = \left( \int_{-\infty}^{\infty} I(z) dz \right) / I_{max}. \quad (3)$$

Based on the profile in Figure S3,  $h$  can be calculated to be 560  $\mu\text{m}$ .  $hI_{max}$  can be presented as a dashed-line rectangle as shown in Figure S5. Therefore, the effectively illuminated number of BiPy molecules in aqueous solution,  $N_{bulk}$ , can be written as:

$$N_{bulk} = AhcN_A = 560AcN_A, \quad (4)$$

Where  $c$  is the concentration of BiPy solution and  $N_A$  is the Avogadro constant. With Eqs. (2) and (4), Eq. (1) can be rearranged as:

$$EF = (560cN_A\sigma I_{sur}) / (2I_{bulk}). \quad (5)$$

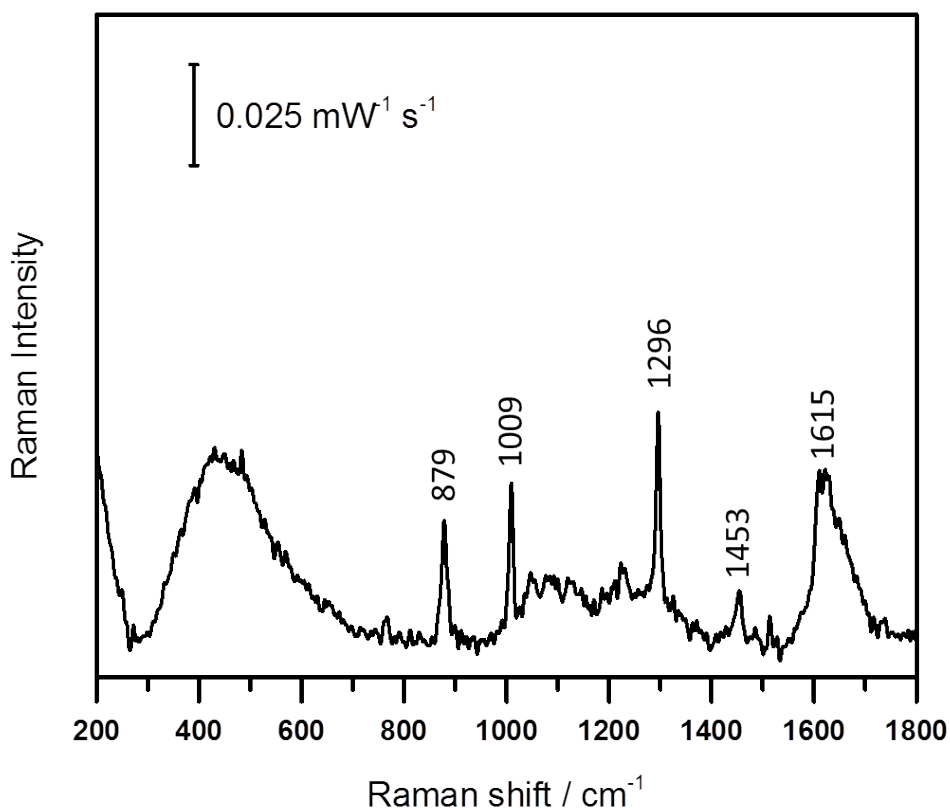

**Figure S6.** Normal Raman signal of 4, 4'-BiPy solution with concentration of 0.01 M (532 nm, 10 mW, 60 s) .

Thus, the average  $EF$  value for the fab-chip substrate with deposition of concentrated AgNPs was calculated to be  $3.21 \times 10^8$  based on  $1009 \text{ cm}^{-1}$  band in Figure S6 and  $1020 \text{ cm}^{-1}$  band shows in Figure 4b in the revised manuscript.

## References

1. E. C. Le Ru, E. Blackie, M. Meyer and P. G. Etchegoin, *J. Phys. Chem. C*, 2007, **111**, 13794-13803.
2. W. B. Cai, B. Ren, X. Q. Li, C. X. She, F. M. Liu, X. W. Cai and Z. Q. Tian, *Surf. Sci.*, 1998, **406**, 9-22.
3. M. Suzuki, Y. Niidome and S. Yamada, *Thin Solid Films*, 2006, **496**, 740-747.
